# Supplementary material
Source: PubMed Central journal article supplement (PMC7232007)

Fig 1A

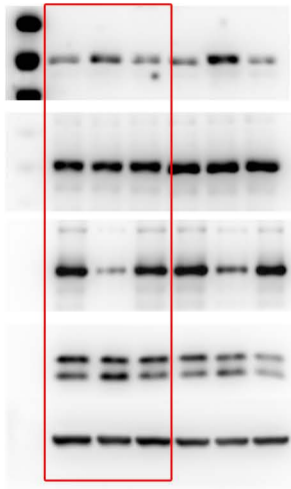

Fig 1B

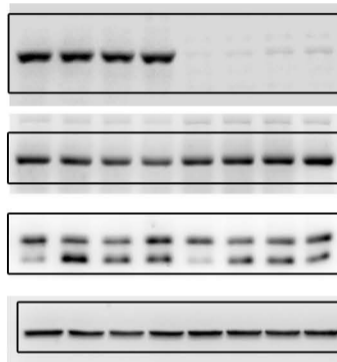

Fig 1C

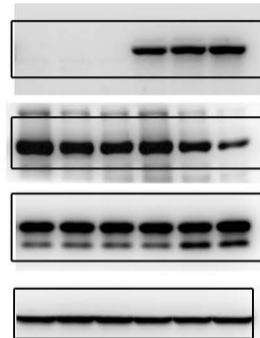

Supplement: EMBJ-39-e103111-s003.pdf [file EMBJ-39-e103111-s003.pdf]

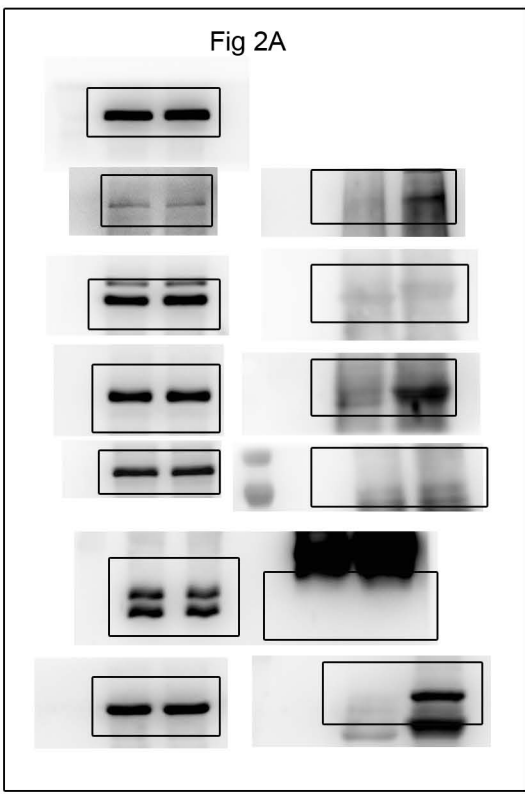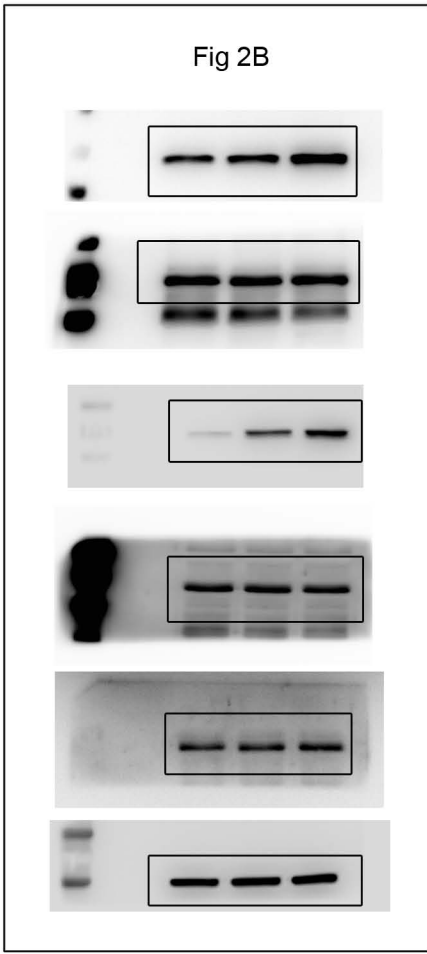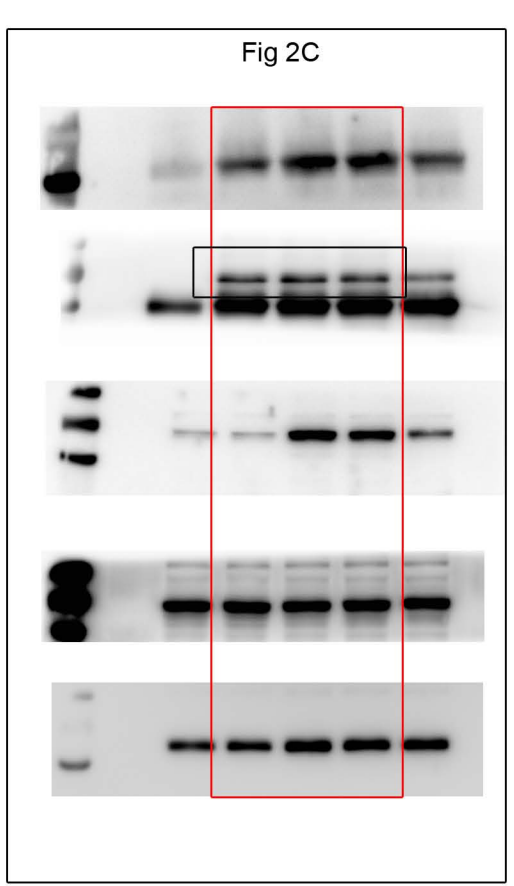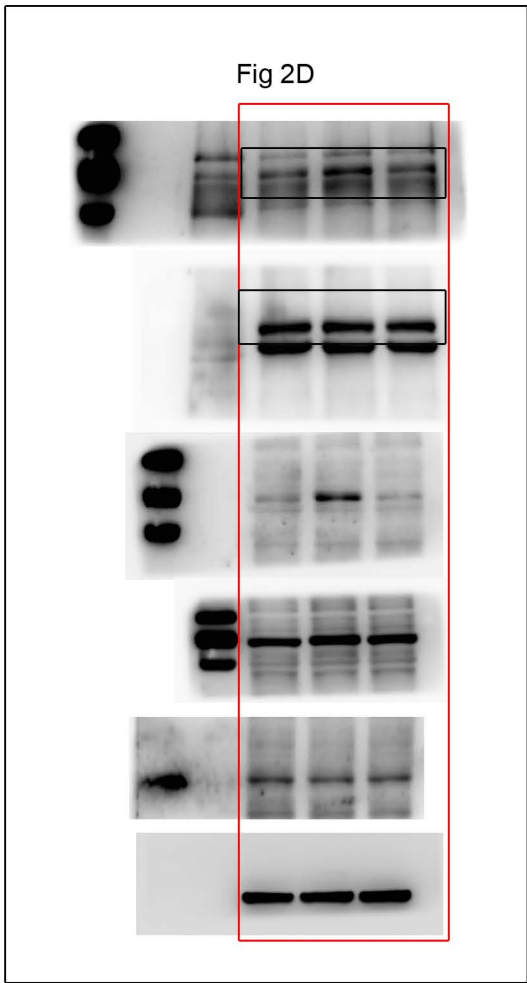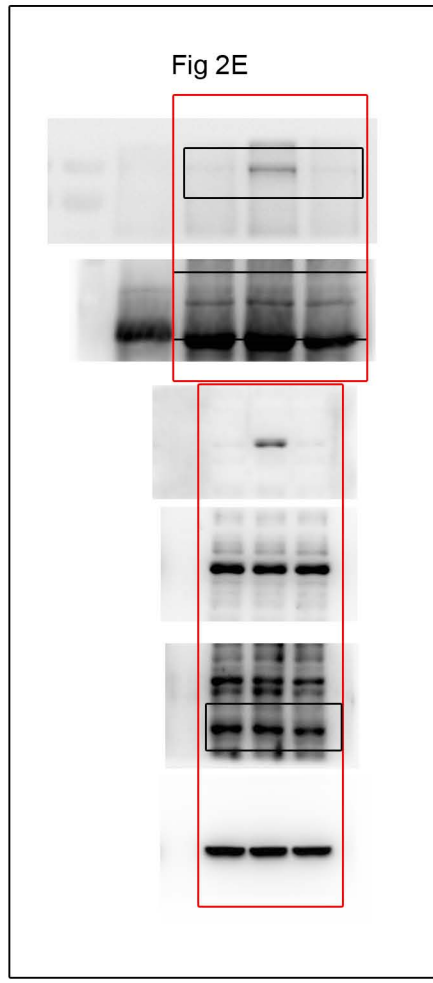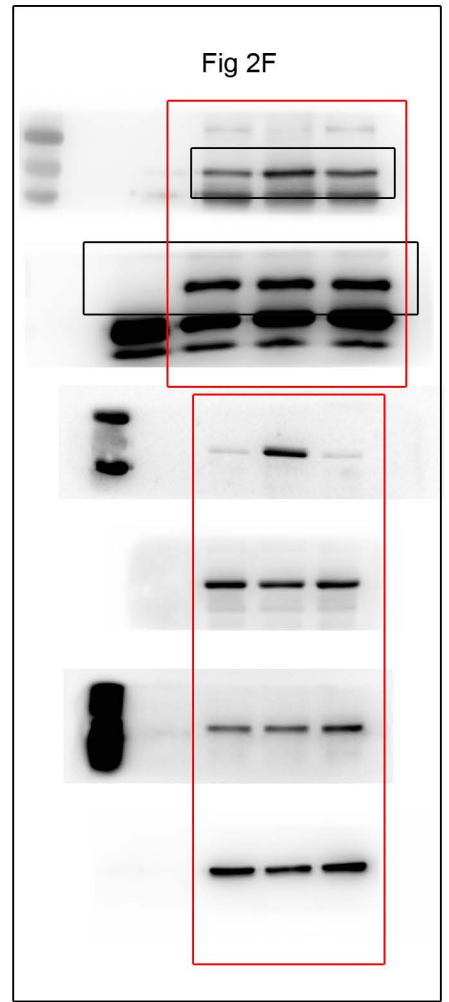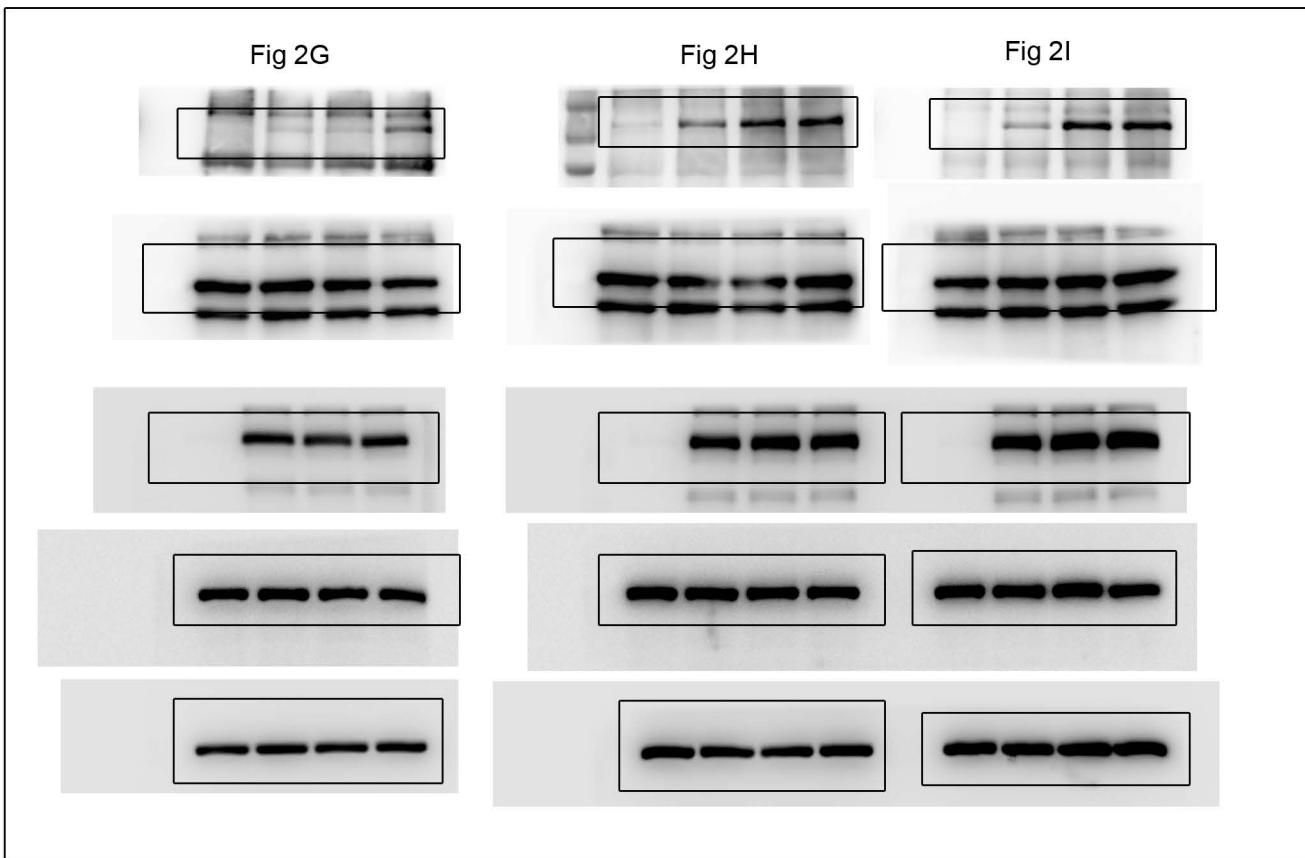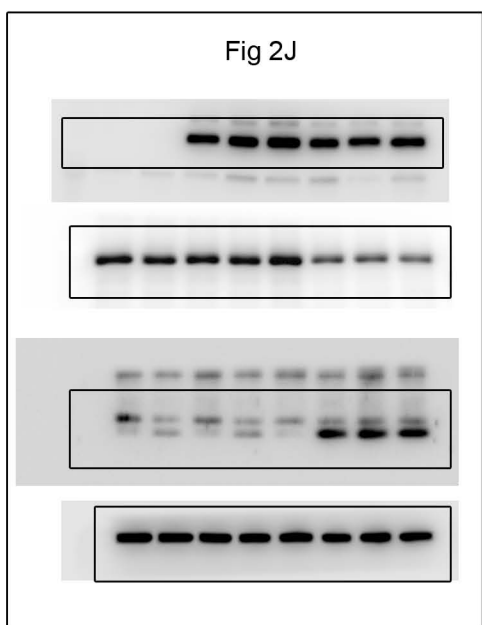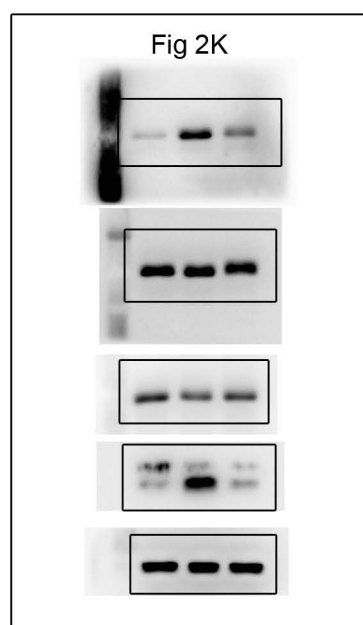

Supplement: EMBJ-39-e103111-s004.pdf [file EMBJ-39-e103111-s004.pdf]

Fig 3A

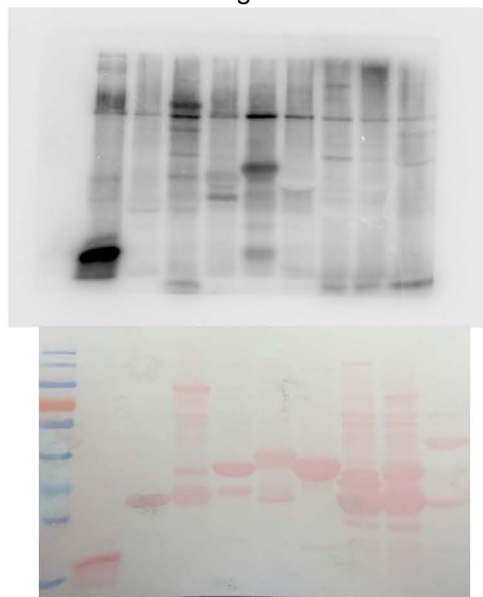

Fig 3C

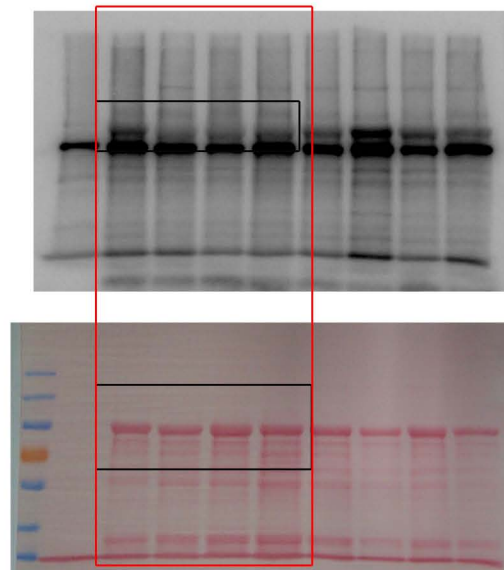

Fig 3D

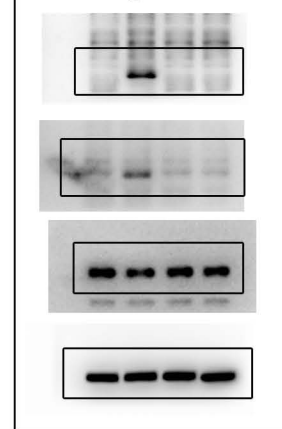

Fig 3E

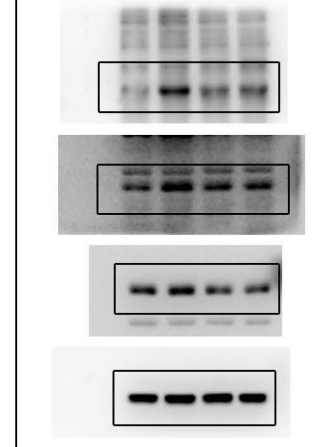

Fig 3F

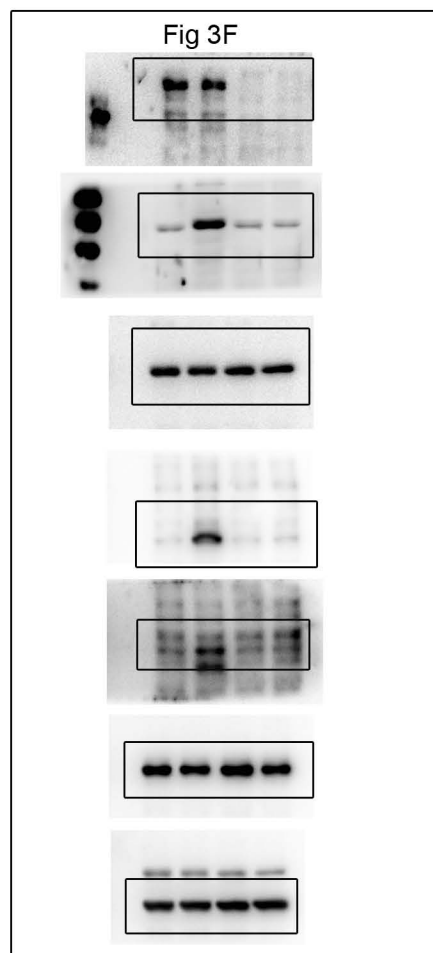

Fig 3G

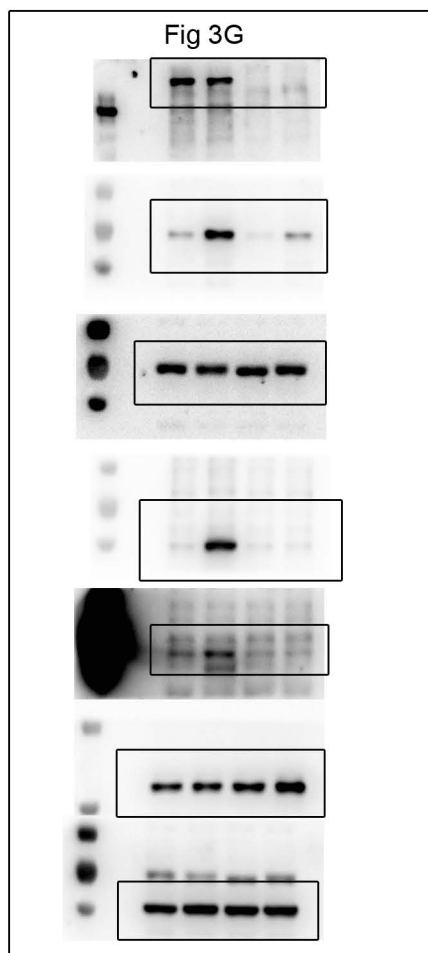

Fig 3H

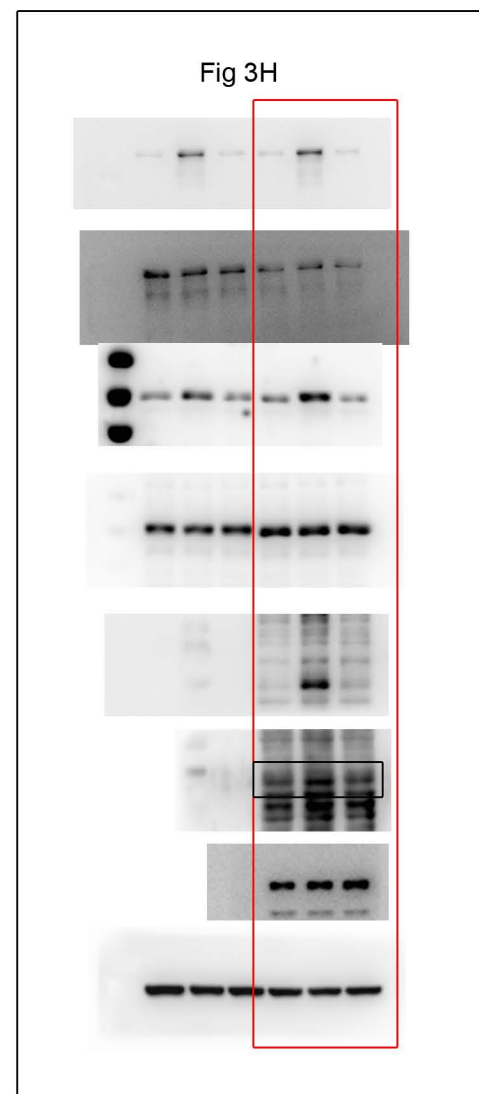

Supplement: EMBJ-39-e103111-s005.pdf [file EMBJ-39-e103111-s005.pdf]

Fig 4A

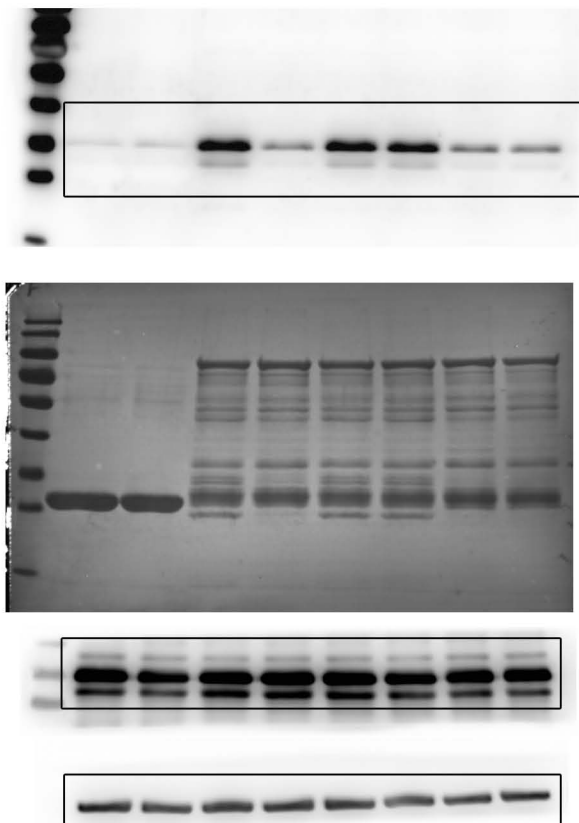

Fig 4B

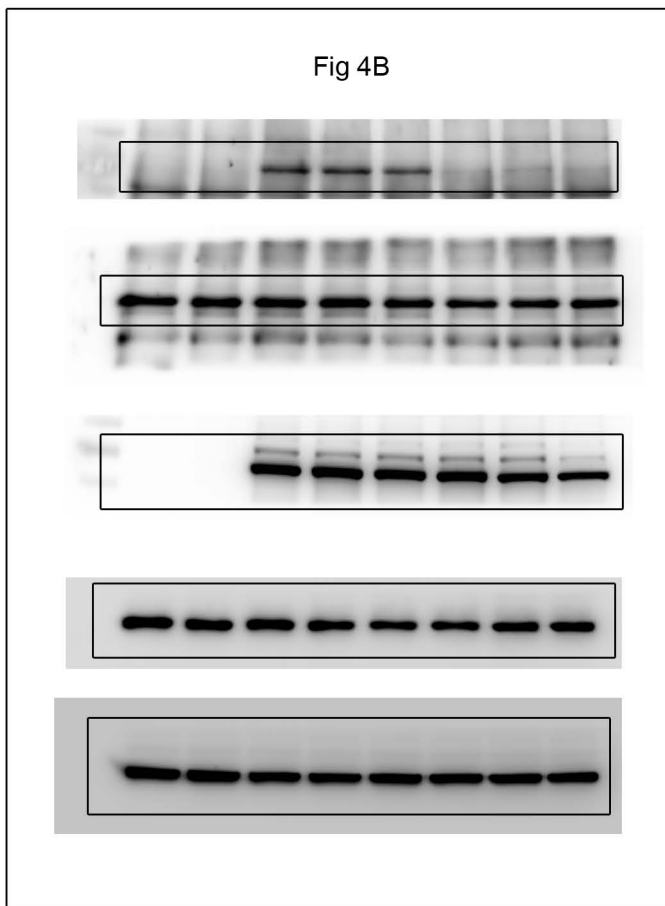

Fig 4C

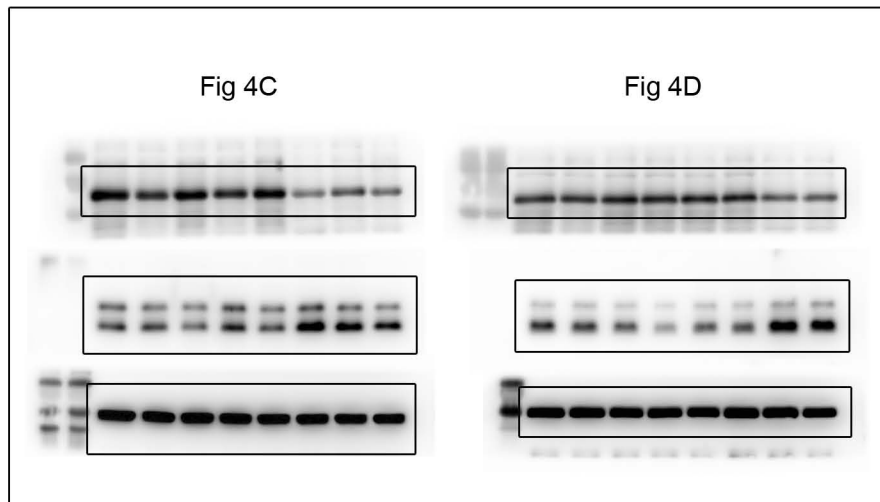

Fig 4D

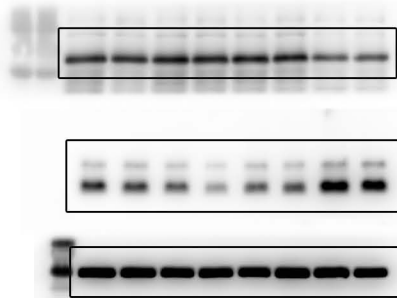

Fig 4F

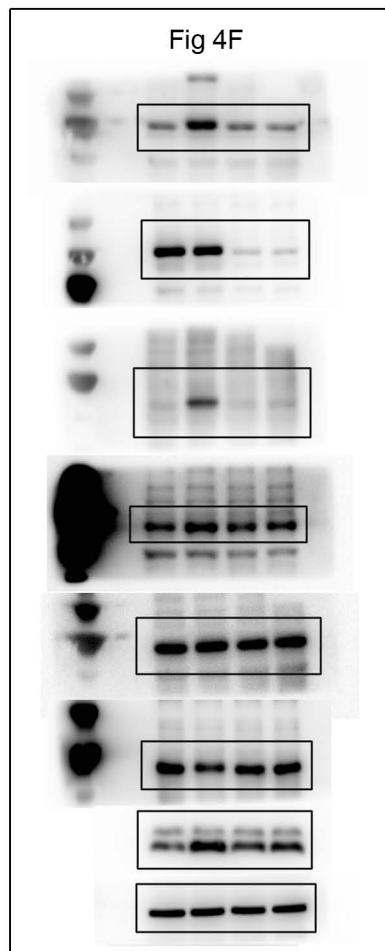

Supplement: EMBJ-39-e103111-s006.pdf [file EMBJ-39-e103111-s006.pdf]

Fig 5A

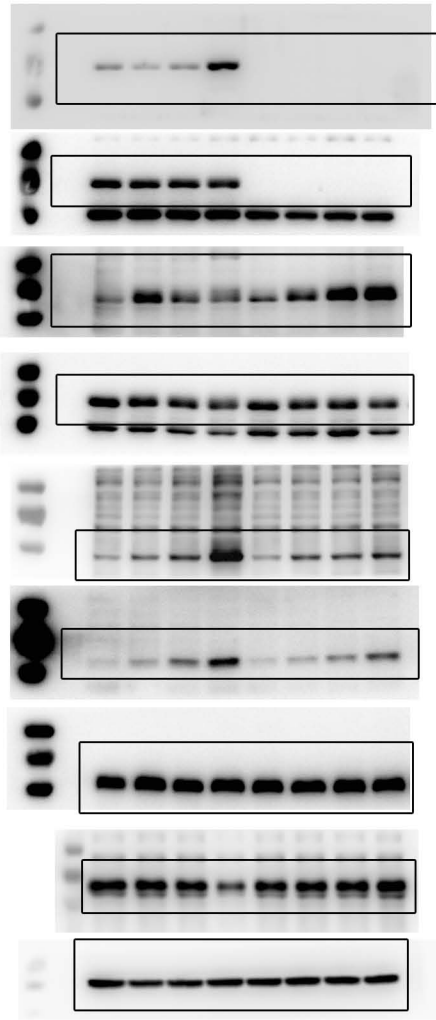

Fig 5B

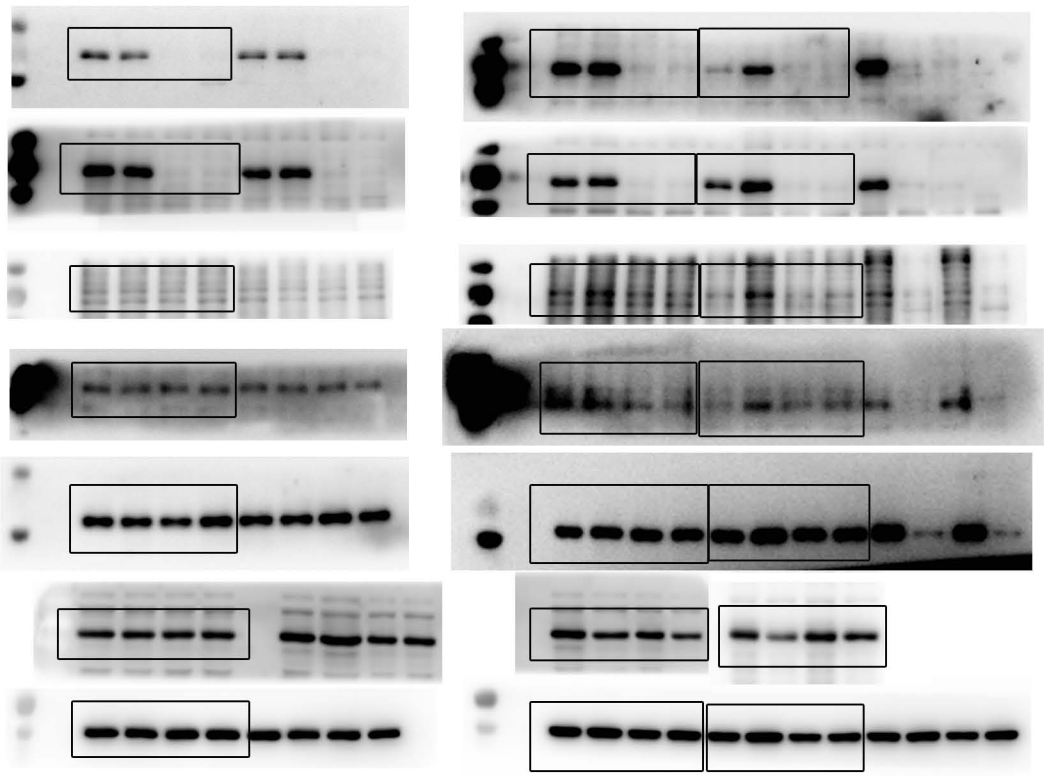

Fig 5C

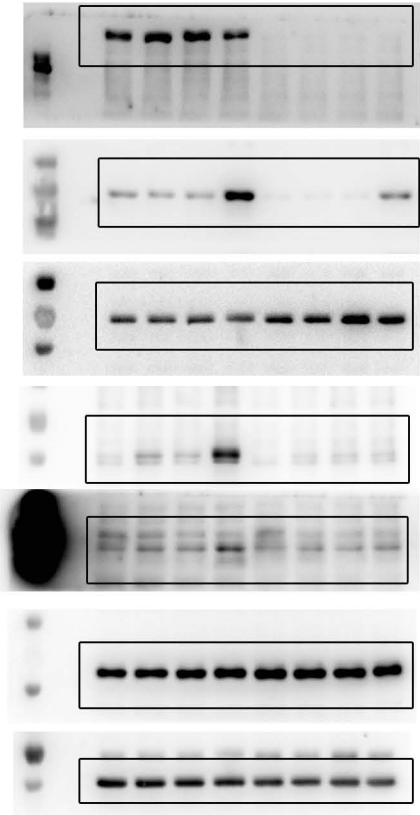

Fig 5D

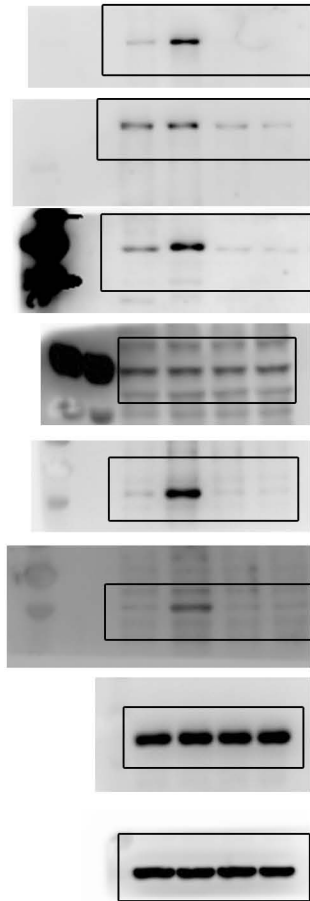

Fig 5E

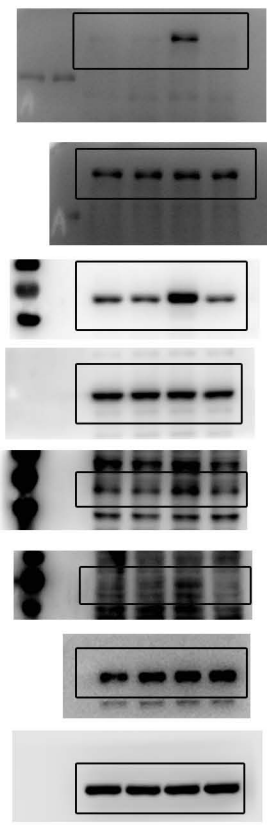

Fig 5F

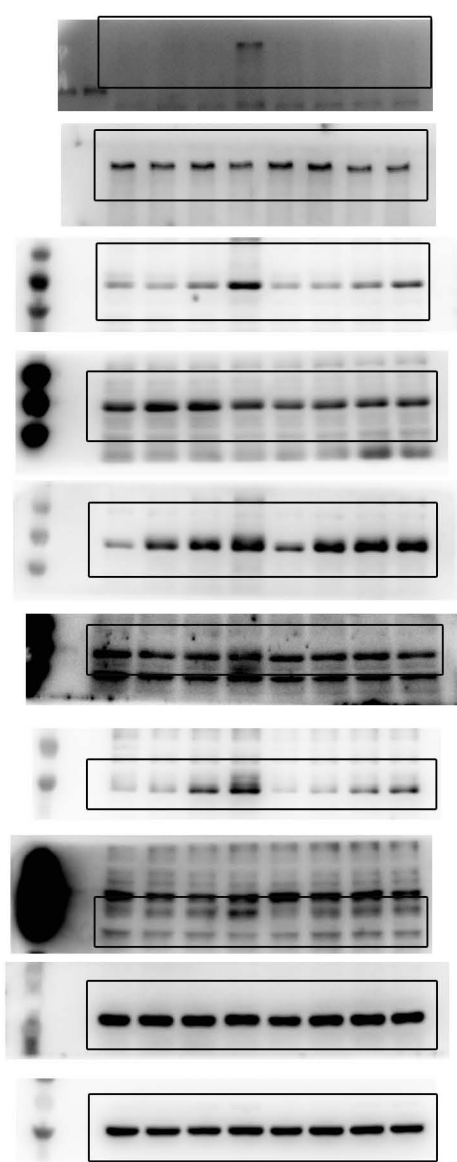

Fig 5G

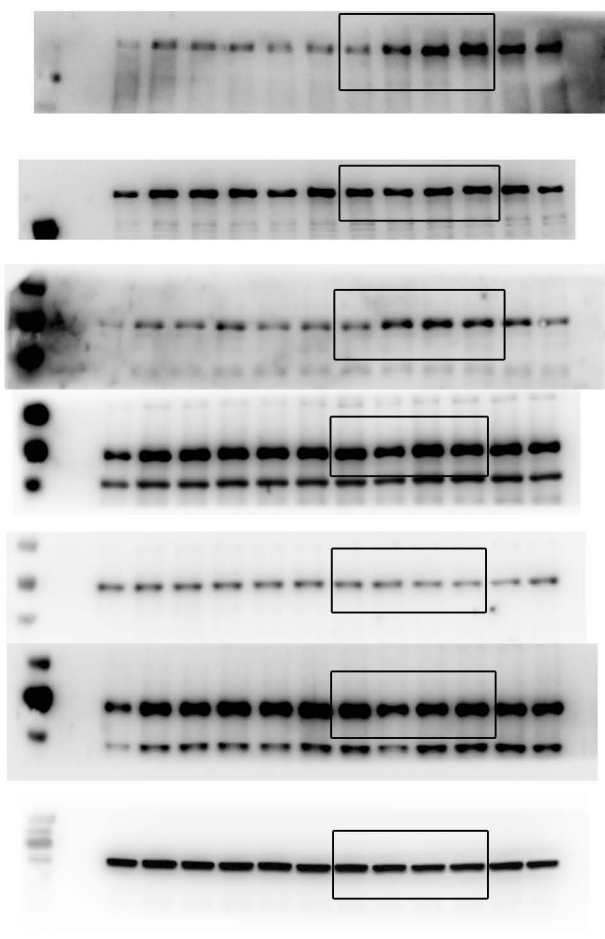

Fig 5H

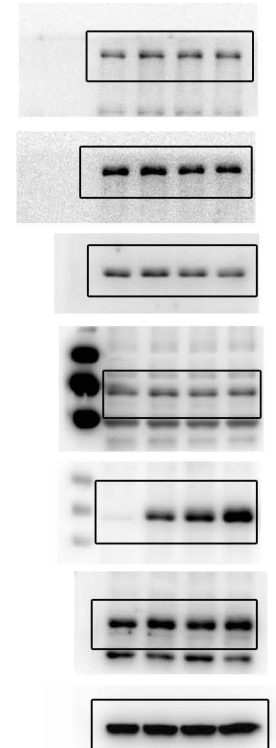

Supplement: EMBJ-39-e103111-s007.pdf [file EMBJ-39-e103111-s007.pdf]
